# Supplementary material for: Canonical androgen response element motifs are tumor suppressive regulatory elements in the prostate
Source: PubMed Central journal article supplement (PMC11645413; doi:10.1038/s41467-024-53734-z), 2024-12-13
Supplement: 41467_2024_53734_MOESM3_ESM.pdf [file 41467_2024_53734_MOESM3_ESM.pdf]

## Canonical androgen response element motifs are tumor suppressive regulatory elements in the prostate

Corresponding Author: Dr Christopher Barbieri

This manuscript has been previously reviewed at another journal. This document only contains reviewer comments, rebuttal and decision letters for versions considered at Nature Communications.

Version 0:

Reviewer comments:

Reviewer #1

(Remarks to the Author)

I have previously reviewed an earlier version of this manuscript. The new version has incorporated a significant amount of new data, which clearly strengthens the main conclusion and the overall impact of the work. My previous concerns have been sufficiently addressed as well. Therefore, I recommend the acceptance of this revised manuscript.

--Ping Mu

Reviewer #2

(Remarks to the Author)

The manuscript has been substantially improved. Most of my initial concerns were addressed. The new data showing HDAC3 function is interesting. It would be nice if HDAC3 ChIPseq was done in MACC Activating model, rather than the less relevant DHT mode, to see if it is specific recruited to those activated ARE sites. However this is optional.

permits use, sharing, adaptation, distribution and reproduction in any medium or format, as long as you give appropriate credit to the original author(s) and the source, provide a link to the Creative Commons license, and indicate if changes were made.

In cases where reviewers are anonymous, credit should be given to 'Anonymous Referee' and the source.

The images or other third party material in this Peer Review File are included in the article's Creative Commons license, unless indicated otherwise in a credit line to the material. If material is not included in the article's Creative Commons license and your intended use is not permitted by statutory regulation or exceeds the permitted use, you will need to obtain permission directly from the copyright holder.

To view a copy of this license, visit <https://creativecommons.org/licenses/by/4.0/>

**Reviewer 1 Comment:**

**General comments:**

“I have previously reviewed an earlier version of this manuscript. The new version has incorporated a significant amount of new data, which clearly strengthens the main conclusion and the overall impact of the work. My previous concerns have been sufficiently addressed as well. Therefore, I recommend the acceptance of this revised manuscript.”

**Reviewer 2 Comment:**

**General comments:**

“The manuscript has been substantially improved. Most of my initial concerns were addressed. The new data showing HDAC3 function is interesting. It would be nice if HDAC3 ChIPseq was done in MACC Activating model, rather than the less relevant DHT mode, to see if it is specific recruited to those activated ARE sites. However this is optional.”

**Response:** We thank the reviewers for their positive comments and appreciate that the manuscript was improved thanks to their feedback and suggestions.
